# Supplementary material for: Au-modified three-dimensional In2O3 inverse opals: synthesis and improved performance for acetone sensing toward diagnosis of diabetes
Source: Royal Society of Chemistry journal article supplement (doi:10.1039/c5nr02709h), 2015-01-01
Supplement: c5nr02709h1.pdf [file c5nr02709h1.pdf]

**Au modified three-dimensional In<sub>2</sub>O<sub>3</sub> inverse opals: synthesis  
and improved performance for acetone sensing toward diagnosis  
of diabetes**

Ruiqing Xing, Qingling Li, Lei Xia, Jian Song, Lin Xu\*, Jiahuan Zhang, Yi Xie, and  
Hongwei Song\*

*State Key Laboratory on Integrated Optoelectronics, College of Electronic Science  
and Engineering, Jilin University, Changchun, 130012, People's Republic of China*

*\*E-mail: [linxu@jlu.edu.cn](mailto:linxu@jlu.edu.cn), [songhw@jlu.edu.cn](mailto:songhw@jlu.edu.cn)*

*Tel: 86-431-81736604*

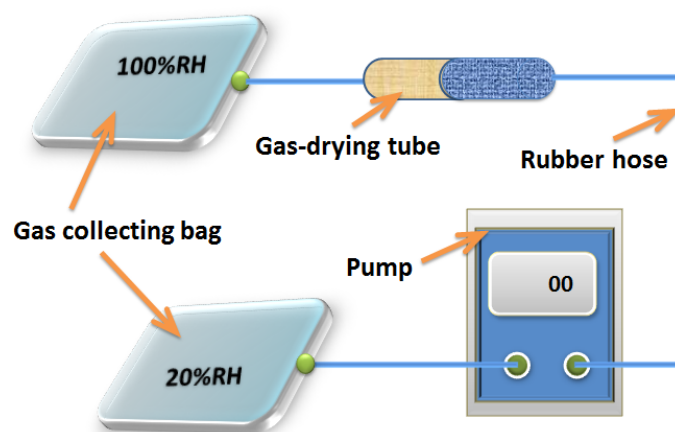

**Scheme S1.** Diagram of the dehumidification process.

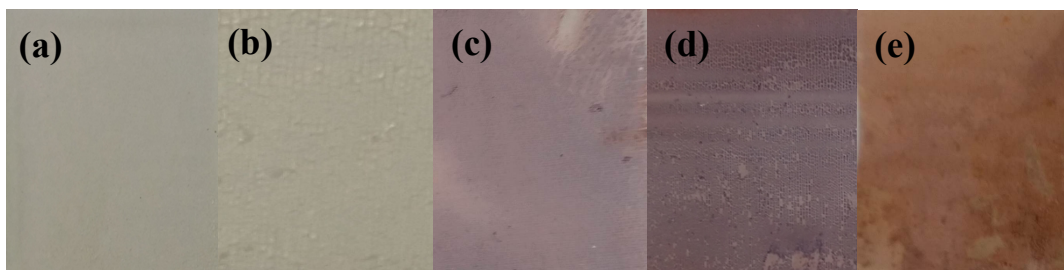

**Fig. S1** (a-e) Photos of S1-S5 3DIO thin film on the glass substance. The photos were taken under normal indoor environment.

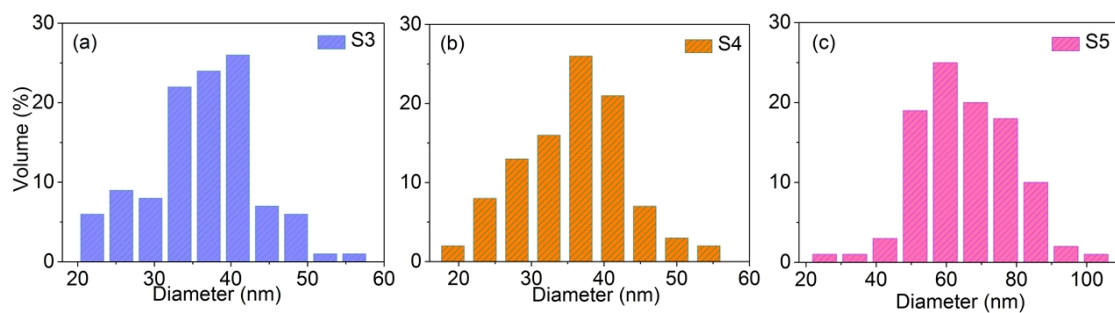

**Fig. S2** (a-c) The Au NPs size distribution of S3-S5 3DIO Au/In<sub>2</sub>O<sub>3</sub>, and the size distribution were calculated through measuring at least 100 Au NPs.

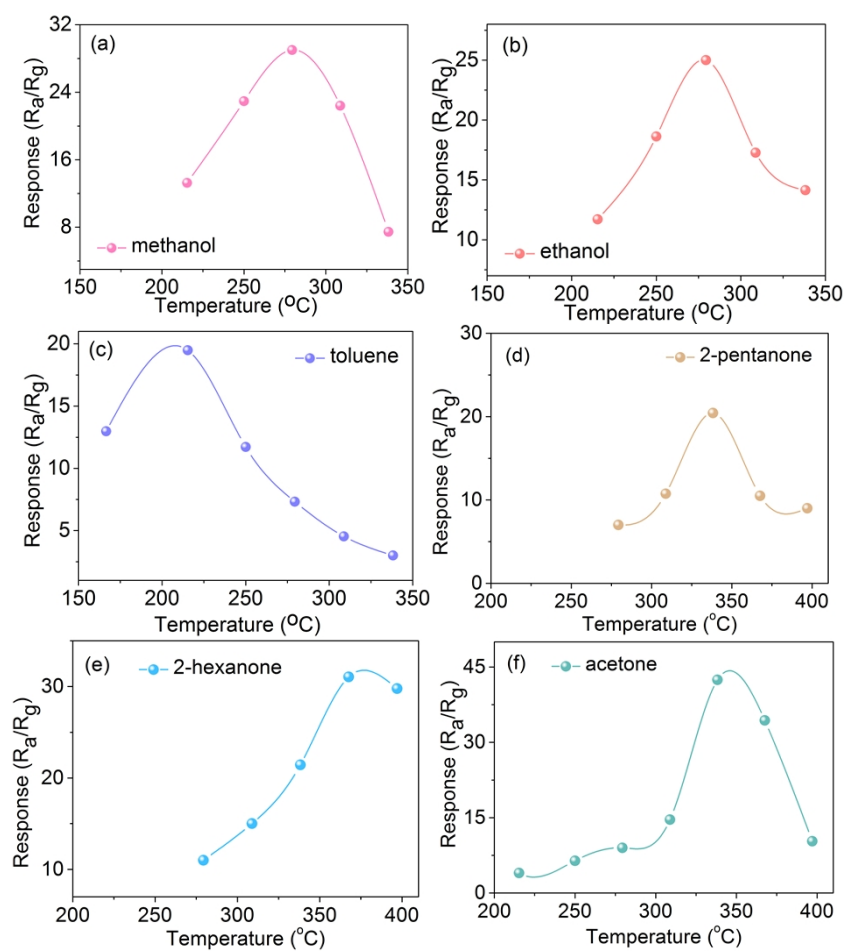

**Fig. S3** (a-f) Responses of S4 3DIO gas sensor to 5 ppm gases as a function of operating temperature.
